# Supplementary material
Source: ML conference proceedings conference paper supplement (https://openaccess.thecvf.com/content/CVPR2024/html/Luo_LaRE2_Latent_Reconstruction_CVPR_2024_paper.html)
Supplement: Supplementary file 1 [file Luo_LaRE2_Latent_Reconstruction_CVPR_2024_supplemental.pdf]

| Model         | Testing Diffusion Generators |      |       |      |      |      |      |      | Total Avg. |
|---------------|------------------------------|------|-------|------|------|------|------|------|------------|
|               | ADM                          | DDPM | IDDPM | LDM  | PNDM | SDV1 | SDV2 | VQDM |            |
| CNNsplot [39] | 100                          | 99.6 | 100   | 99.1 | 85.8 | 98.2 | 99.9 | 96.1 | 97.3       |
| F3Net [29]    | 99.6                         | 99.6 | 99.9  | 99.2 | 95.3 | 91.7 | 97.8 | 98.7 | 97.7       |
| DIRE [40]     | 100                          | 100  | 100   | 100  | 100  | 100  | 100  | 100  | 100        |
| Ours          | 100                          | 99.4 | 100   | 99.9 | 99.9 | 100  | 99.9 | 100  | 99.9       |

Table 4. Comparisons of AP on DiffusionForensics [40] Dataset.

### Necessity of diffusion-generated image detection:

Diffusion-generated image detection, a subset of forgery detection, has unique features that necessitate special attention. The creation process leaves specific artifacts [1, 2, 6] requiring specialized detection methods. The prevalence and realism of these images have increased due to the development of diffusion models [3, 5], presenting new challenges [4]. Focusing on this task improves our understanding of various image forgeries.

### More theoretical analysis on the difference between fakes and reals:

Generated images have a higher posterior probability after being sampled from the generative model, making them more easily reconstructed by the model. The observed phenomenon is generalizable, as evidenced across eight GenImage [8] benchmark models.

**Experiments on DiffusionForensics:** In Tab. 4, we present the results on the DiffusionForensics [6] Dataset. Following DIRE [6], we train our model on LSUN-B [7]. The fake images are generated by ADM [3]. Both our method and DIRE exhibit performance advantage over existing methods. Notably, our method not only matches DIRE in terms of effectiveness but also outperforms it in efficiency, which is **8x** faster. This clearly underscores the superior efficacy and efficiency of our approach.

## References

- [1] Riccardo Corvi, Davide Cozzolino, Giovanni Poggi, Koki Nagano, and Luisa Verdoliva. Intriguing properties of synthetic images: from generative adversarial networks to diffusion models. In *CVPR*, pages 973–982, 2023. 1
- [2] Riccardo Corvi, Davide Cozzolino, Giada Zingarini, Giovanni Poggi, Koki Nagano, and Luisa Verdoliva. On the detection of synthetic images generated by diffusion models. In *ICASSP*, pages 1–5. IEEE, 2023. 1
- [3] Prafulla Dhariwal and Alexander Nichol. Diffusion models beat gans on image synthesis. 34:8780–8794, 2021. 1
- [4] Felix Juefei-Xu, Run Wang, Yihao Huang, Qing Guo, Lei Ma, and Yang Liu. Countering malicious deepfakes: Survey, battleground, and horizon. 130(7):1678–1734, 2022. 1
- [5] Robin Rombach, Andreas Blattmann, Dominik Lorenz, Patrick Esser, and Björn Ommer. High-resolution image synthesis with latent diffusion models. In *CVPR*, pages 10684–10695, 2022. 1
- [6] Zhendong Wang, Jianmin Bao, Wengang Zhou, Weilun Wang, Hezhen Hu, Hong Chen, and Houqiang Li. Dire for diffusion-generated image detection. 2023. 1
- [7] Fisher Yu, Ari Seff, Yinda Zhang, Shuran Song, Thomas Funkhouser, and Jianxiong Xiao. Lsun: Construction of a large-scale image dataset using deep learning with humans in the loop. 2015. 1
- [8] Mingjian Zhu, Hanting Chen, Qiangyu Yan, Xudong Huang, Guanyu Lin, Wei Li, Zhijun Tu, Hailin Hu, Jie Hu, and Yunhe Wang. Genimage: A million-scale benchmark for detecting ai-generated image. 2023. 1
